# Supplementary material for: Enhanced sulfur resistance by constructing MnOx–Co3O4 interface on Ni foam in the removal of benzene
Source: Royal Society of Chemistry journal article supplement (doi:10.1039/d2en00893a), 2022-11-18
Supplement: d2en00893a1.pdf [file d2en00893a1.pdf]

## **Enhanced Sulfur Resistance by Constructing MnO<sub>x</sub>-Co<sub>3</sub>O<sub>4</sub> Interface on Ni Foam in the Removal of Benzene**

Dawei Han<sup>a</sup>, Menglan Xiao<sup>a</sup>, Yuechang Wei<sup>b</sup>, Xueqin Yang<sup>d</sup>, Yucong Guo<sup>a</sup>, Lingjuan Ma<sup>c</sup>,  
Xiaolin Yu<sup>\*a</sup>, Maofa Ge<sup>a</sup>

<sup>a</sup>State Key Laboratory for Structural Chemistry of Unstable and Stable Species, Beijing National Laboratory for Molecular Sciences (BNLMS), CAS Research/Education Center for Excellence in Molecular Sciences, Institute of Chemistry, Chinese Academy of Sciences, Beijing 100190, P. R. China

<sup>b</sup>State Key Laboratory of Heavy Oil Processing, China University of Petroleum, Beijing 102249, P. R. China

<sup>c</sup>School of Chemistry and Chemical Engineering, Qufu Normal University, Qufu 273165, P. R. China

<sup>d</sup>College of Forestry, Henan Agricultural University, Zhengzhou 450002, P. R. China

\* Email: icecoolyu@iccas.ac.cn

## Content

|                                                                                                                                                                                                                                                                                                                                       |           |
|---------------------------------------------------------------------------------------------------------------------------------------------------------------------------------------------------------------------------------------------------------------------------------------------------------------------------------------|-----------|
| <b>Figure S1. TG curves of ZIF-67-NF.....</b>                                                                                                                                                                                                                                                                                         | <b>3</b>  |
| <b>Figure S2. The conversion of Benzene per unit area over the all catalysts. ..</b>                                                                                                                                                                                                                                                  | <b>4</b>  |
| <b>Figure S3. Water effect on Benzene conversion over <math>\text{Co}_3\text{O}_4</math>-NF and <math>\text{Mn}_1\text{Co}_1</math>-NF catalyst. (Gas composition: 100 ppm benzene, 20 % <math>\text{O}_2</math>, <math>\text{N}_2</math> balance, and <math>\text{WHSV} = 120000 \text{ mL g}^{-1} \text{ h}^{-1}</math>). .....</b> | <b>5</b>  |
| <b>Figure S4. SEM images of the (a) NF, (b) ZIF-67-NF. ....</b>                                                                                                                                                                                                                                                                       | <b>6</b>  |
| <b>Figure S5. SEM images of the (a) <math>\text{Mn}_1\text{Co}_2</math>-NF catalyst and (b) <math>\text{Mn}_2\text{Co}_1</math>-NF catalyst; TEM images of (c) <math>\text{Mn}_1\text{Co}_2</math>-NF catalyst and <math>\text{Mn}_2\text{Co}_1</math>-NF catalyst. 7</b>                                                             | <b>7</b>  |
| <b>Figure S6. <math>\text{N}_2</math> adsorption-desorption isotherms and pore size distributions of <math>\text{Co}_3\text{O}_4</math>-NF and <math>\text{Mn}_x\text{Co}_y</math>-NF catalysts. ....</b>                                                                                                                             | <b>9</b>  |
| <b>Figure S7. Line scanning image in different location of <math>\text{Mn}_1\text{Co}_1</math>-NF. ....</b>                                                                                                                                                                                                                           | <b>10</b> |
| <b>Figure S8. In situ DRIFTS spectra of reactant adsorption at 310 °C (a) and the normalized content of reaction intermediate species (b) over <math>\text{Co}_3\text{O}_4</math>-NF catalyst. ....</b>                                                                                                                               | <b>11</b> |
| <b>Figure S9. Side and top views of <math>\text{Co}_3\text{O}_4</math>-NF (a, c) and <math>\text{Mn}_1\text{Co}_1</math>-NF (b, d). ..</b>                                                                                                                                                                                            | <b>12</b> |
| <b>Figure S10. The top view of the <math>\text{SO}_2</math>-adsorbed (b) on <math>\text{Co}_3\text{O}_4</math>-NF and (c) <math>\text{Mn}_1\text{Co}_1</math>-NF. ....</b>                                                                                                                                                            | <b>13</b> |
| <b>Table S1. Physicochemical Properties of the Samples. ....</b>                                                                                                                                                                                                                                                                      | <b>14</b> |

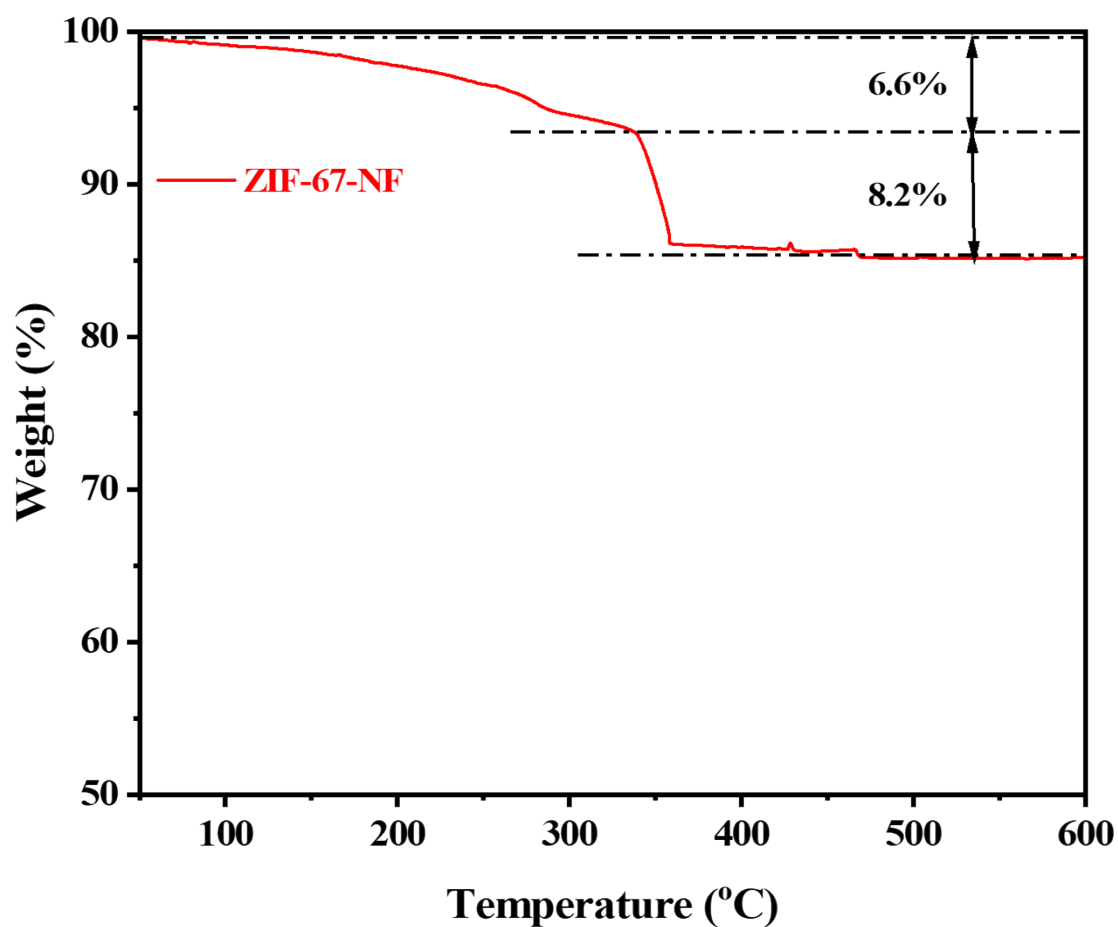

**Figure S1.** TG curves of ZIF-67-NF.

The TG curve of the synthesized ZIF-67-NF is shown in Figure S1. The sample was heated at a constant rate of  $10\text{ }^{\circ}\text{C min}^{-1}$  under an air flow. A weight loss of 6.6 wt % below  $330\text{ }^{\circ}\text{C}$  was attributed to the evaporation of moisture in ZIF-67. ZIF-67 decomposed rapidly and oxidated to  $\text{Co}_3\text{O}_4$  at  $330\text{-}500\text{ }^{\circ}\text{C}$ . The total mass loss is approximately 14.8 %, affording a dark  $\text{Co}_3\text{O}_4\text{-NF}$ .

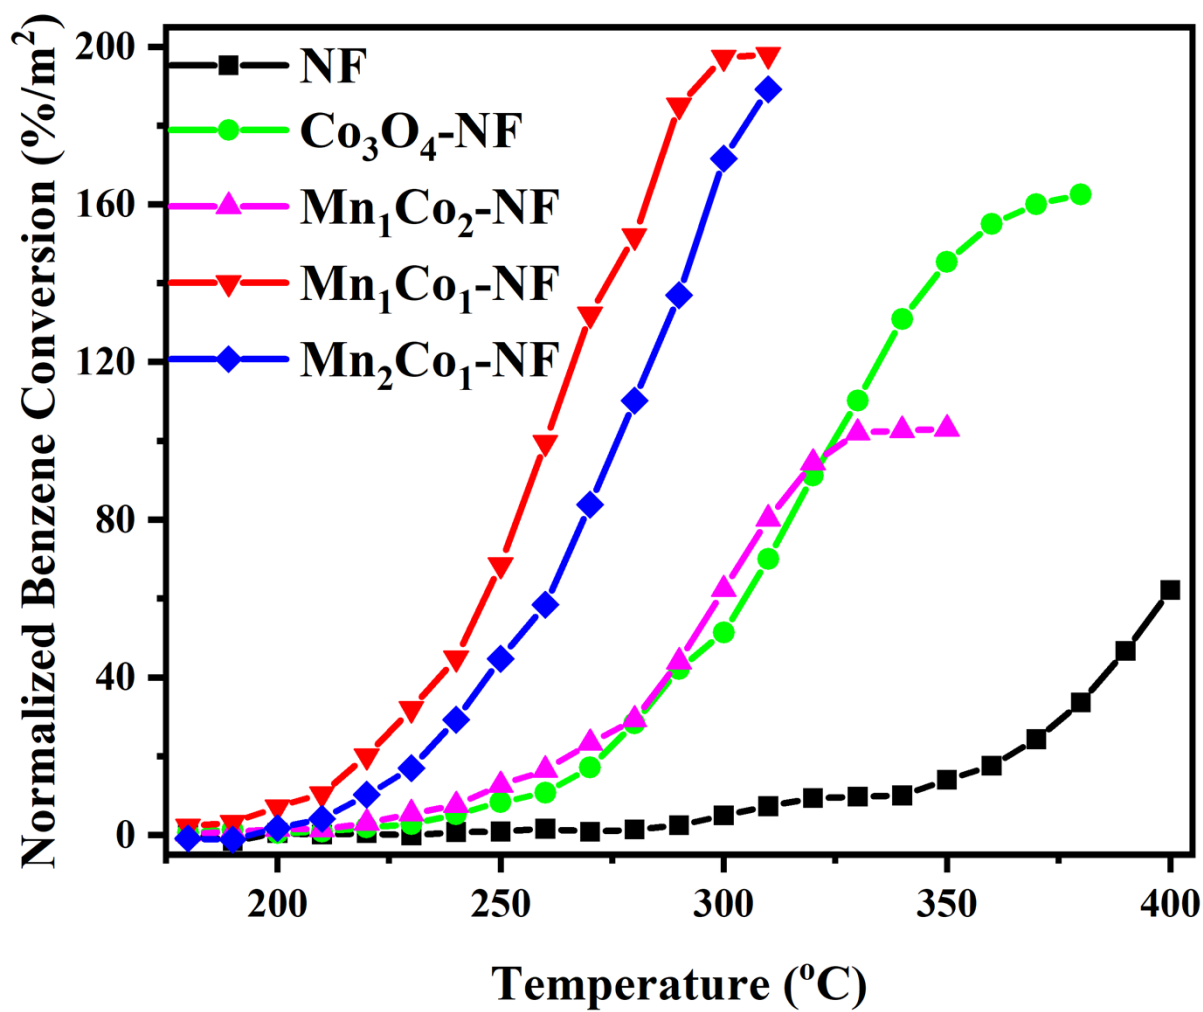

Figure S2. The conversion of Benzene per unit area over the all catalysts.

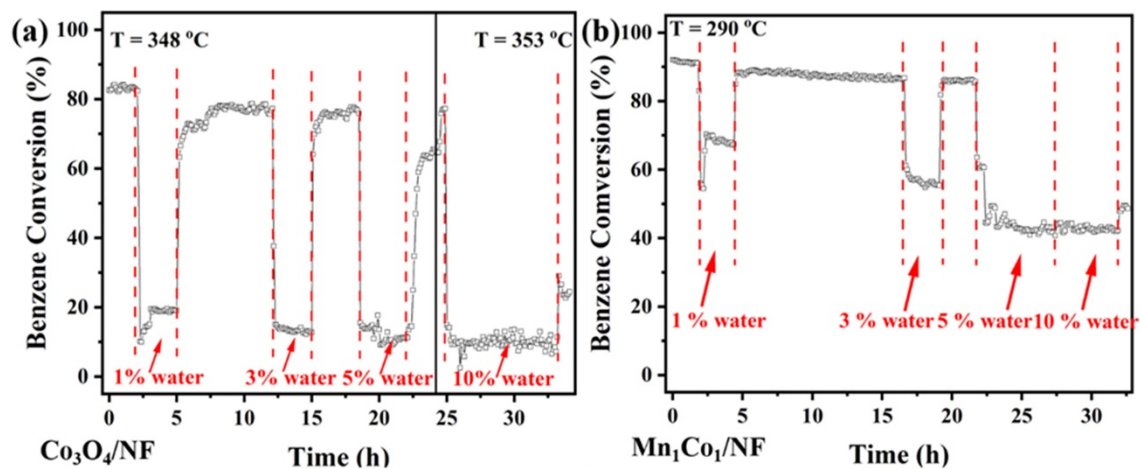

**Figure S3.** Water effect on Benzene conversion over  $\text{Co}_3\text{O}_4\text{-NF}$  and  $\text{Mn}_1\text{Co}_1\text{-NF}$  catalyst. (Gas composition: 100 ppm benzene, 20 %  $\text{O}_2$ ,  $\text{N}_2$  balance, and  $\text{WHSV} = 120000\text{ mL g}^{-1}\text{ h}^{-1}$ ).

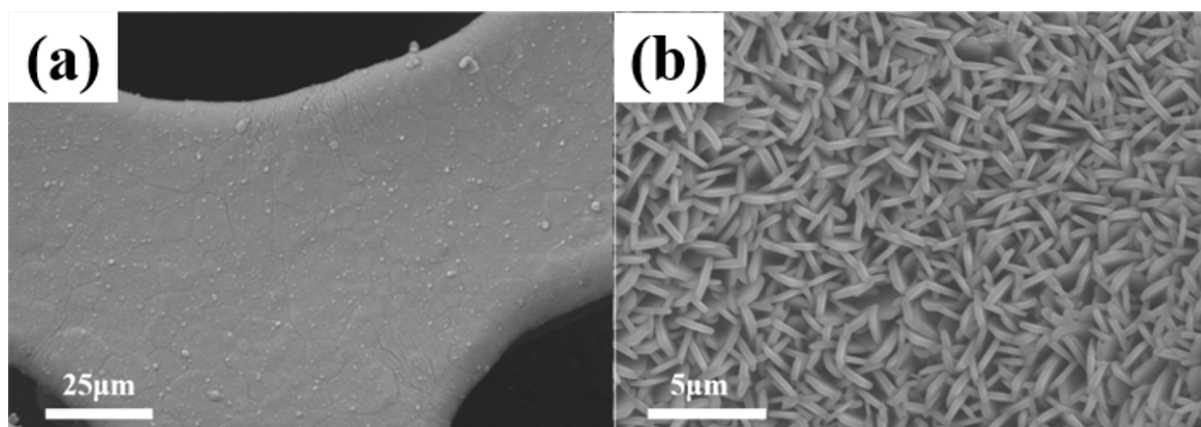

**Figure S4.** SEM images of the (a) NF, (b) ZIF-67-NF.

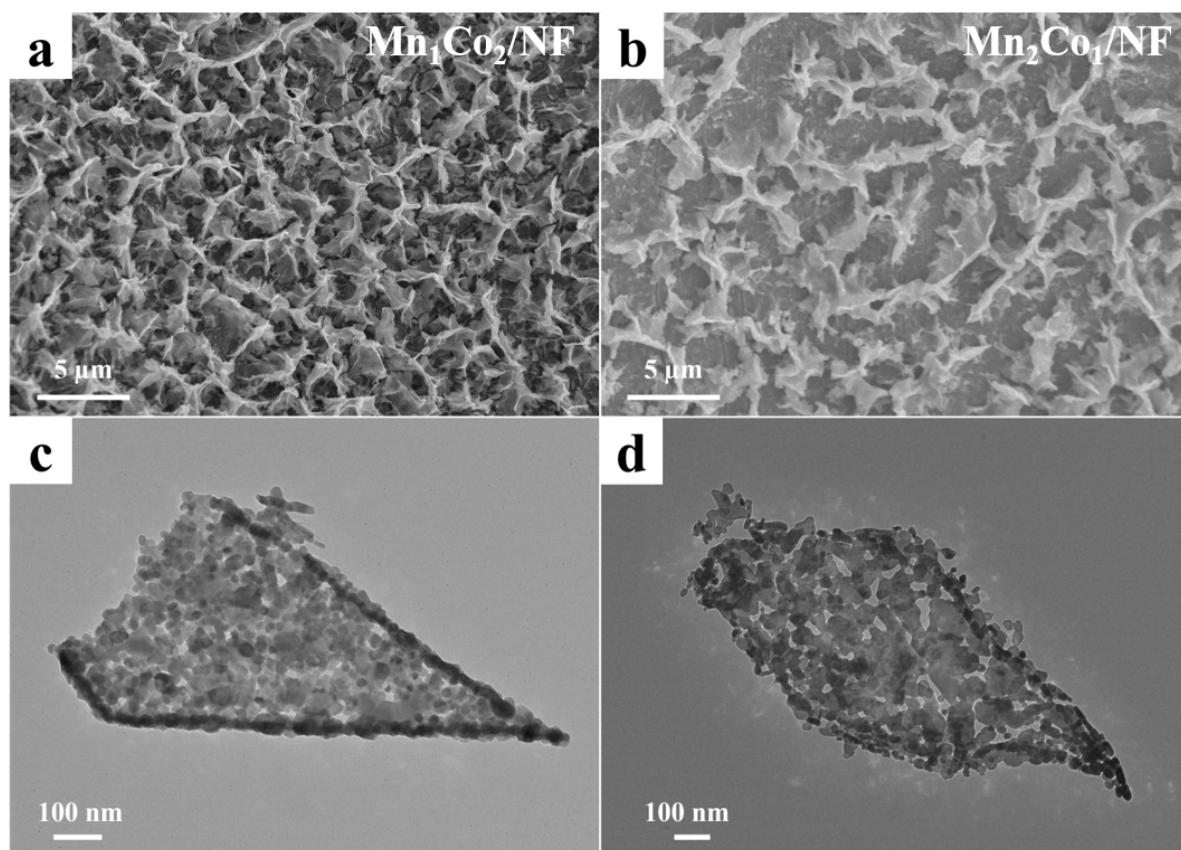

**Figure S5.** SEM images of the (a)  $\text{Mn}_1\text{Co}_2\text{-NF}$  catalyst and (b)  $\text{Mn}_2\text{Co}_1\text{-NF}$  catalyst; TEM images of (c)  $\text{Mn}_1\text{Co}_2\text{-NF}$  catalyst and  $\text{Mn}_2\text{Co}_1\text{-NF}$  catalyst.

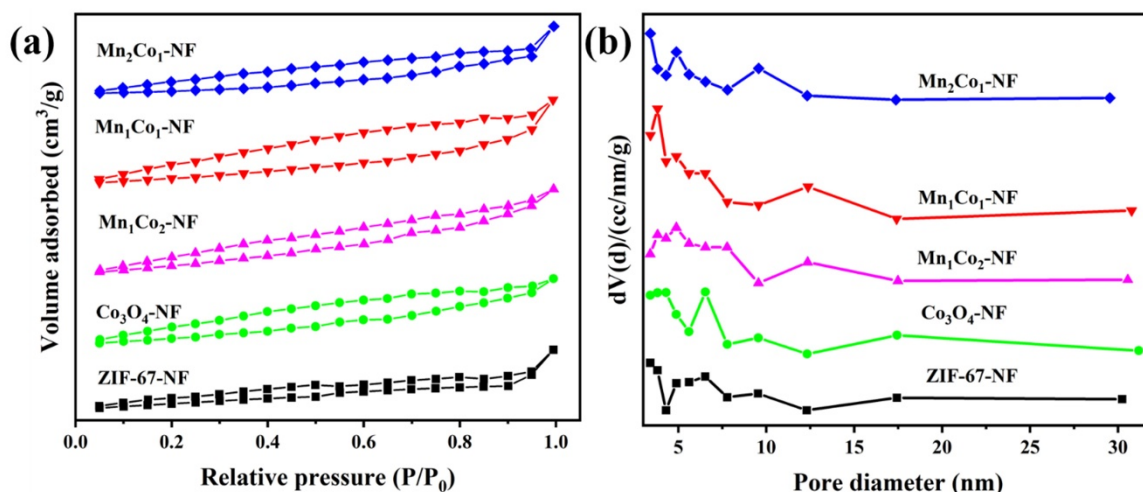

**Figure S6.** N<sub>2</sub> adsorption-desorption isotherms and pore size distributions of Co<sub>3</sub>O<sub>4</sub>-NF and Mn<sub>x</sub>Co<sub>y</sub>-NF catalysts.

The N<sub>2</sub> adsorption/desorption isotherms and pore size distributions of Co<sub>3</sub>O<sub>4</sub>-NF catalyst and Mn<sub>x</sub>Co<sub>y</sub>-NF catalysts were shown in Figure S7, which showed the typical type IV isotherms with a type H3 hysteresis loop for each of the samples, indicating the presence of mesopores structure in these catalysts. The specific surface areas, pore diameters and pore volume of all the catalysts were summarized in Table S1, and it could be found that the specific surface areas of the obtained samples were in the range of 10-20 m<sup>2</sup>/g. Mn<sub>1</sub>Co<sub>2</sub>-NF catalyst had the largest BET surface area (19.4 m<sup>2</sup>/g), and Mn<sub>1</sub>Co<sub>1</sub>-NF catalyst had the lowest BET surface area (1.5 m<sup>2</sup>/g). Therefore, the small difference in specific surface area will be not the main factor that influences the catalytic performance of catalysts.



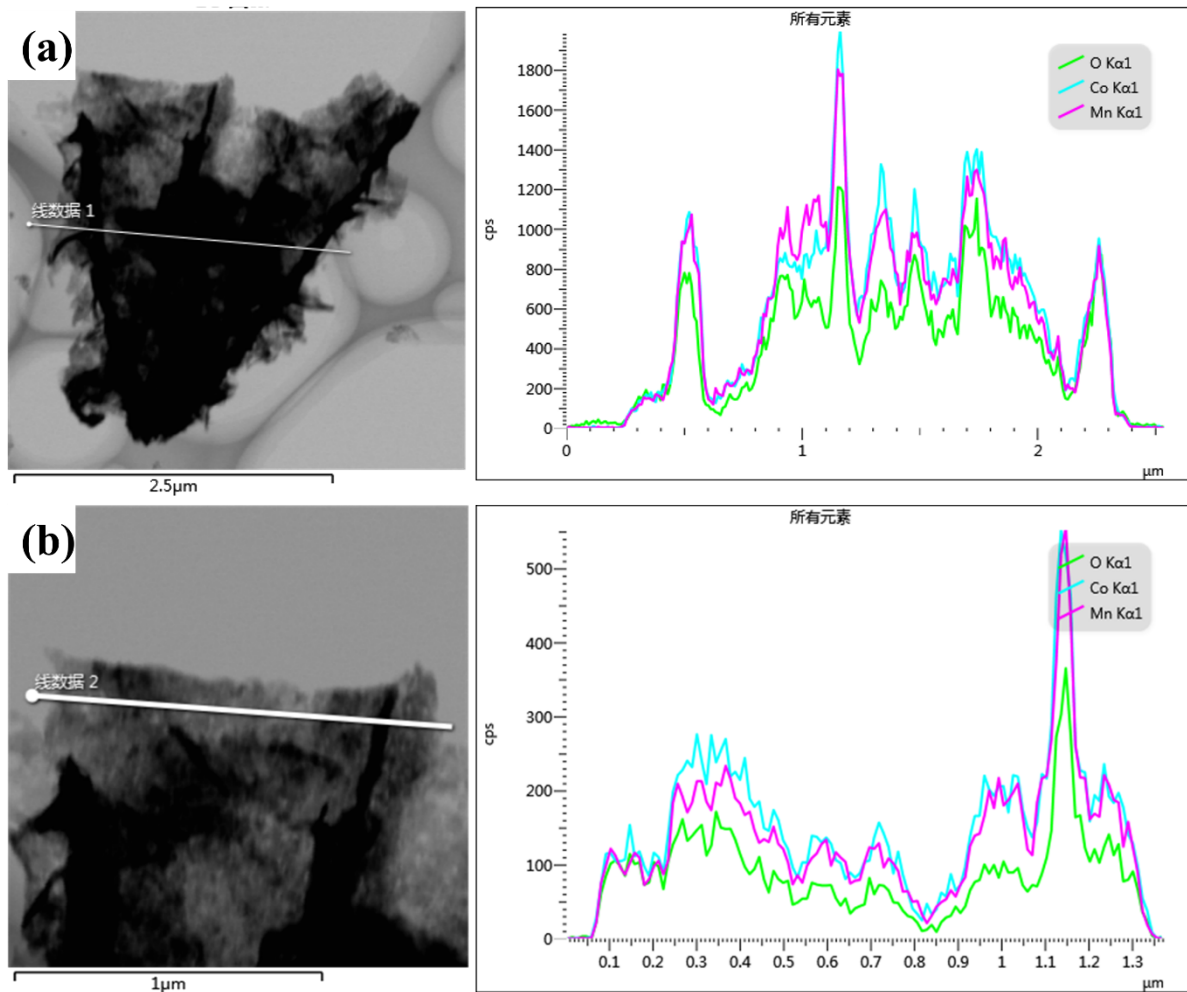

**Figure S7.** Line scanning image in different location of  $\text{Mn}_1\text{Co}_1\text{-NF}$ .

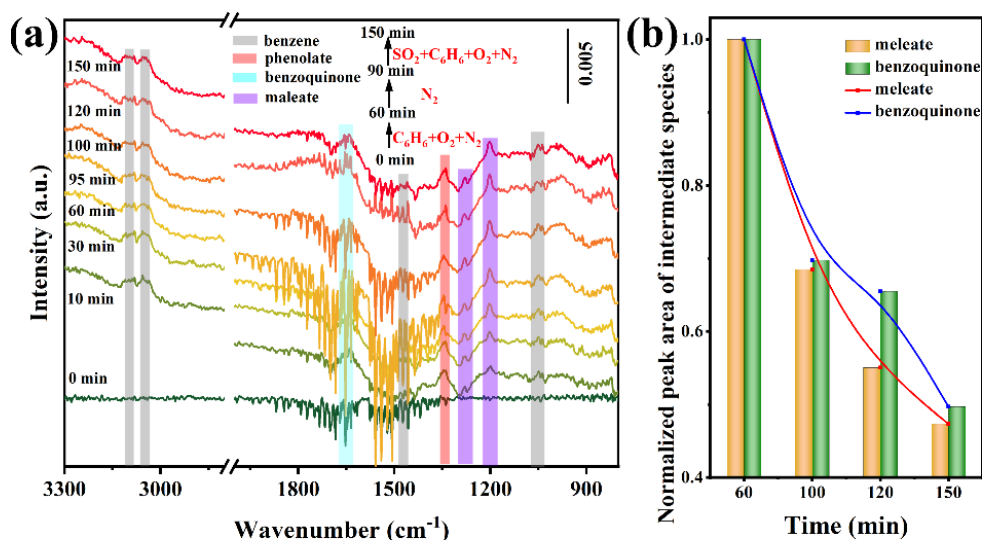

**Figure S8.** In situ DRIFTS spectra of reactant adsorption at 310 °C (a) and the normalized content of reaction intermediate species (b) over  $\text{Co}_3\text{O}_4$ -NF catalyst.

For the  $\text{Co}_3\text{O}_4$ -NF catalyst, the bands at 3096, 3049 and 1048  $\text{cm}^{-1}$  were ascribed to the C-H stretching vibration in the benzene rings<sup>1,2</sup>, the bands at 1630  $\text{cm}^{-1}$  corresponded to the C=O stretching vibrations of quinone species<sup>3</sup>, the bands at 1202 and 1280  $\text{cm}^{-1}$  was ascribed to the phenolate species and the bands at 1349  $\text{cm}^{-1}$  corresponded to maleate species<sup>3-5</sup>, which shows similar intermediate species with  $\text{Mn}_1\text{Co}_1$ -NF catalyst.

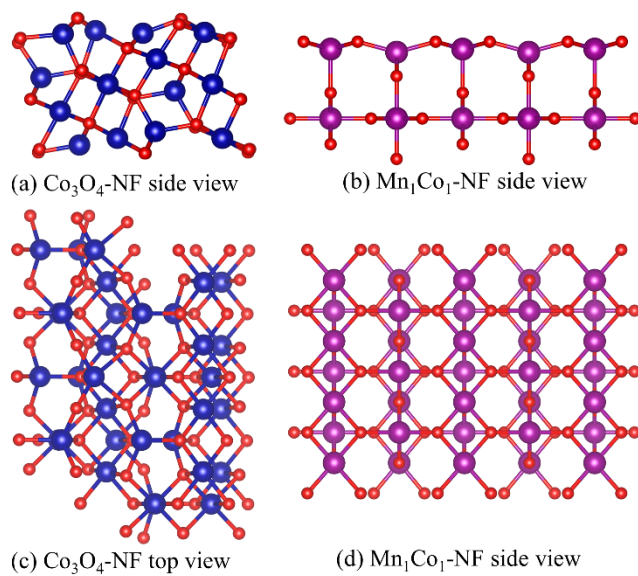

**Figure S9.** Side and top views of  $\text{Co}_3\text{O}_4\text{-NF}$  (a, c) and  $\text{Mn}_1\text{Co}_1\text{-NF}$  (b, d).

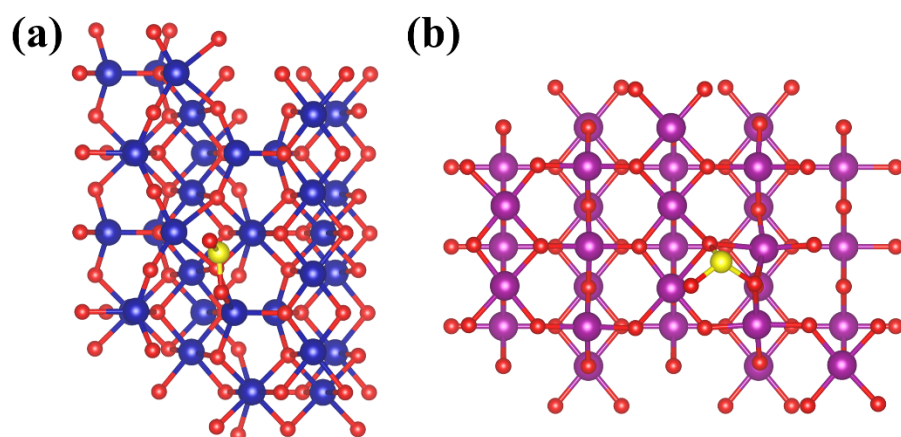

**Figure S10.** The top view of the SO<sub>2</sub>-adsorbed (b) on Co<sub>3</sub>O<sub>4</sub>-NF and (c) Mn<sub>1</sub>Co<sub>1</sub>-NF.

**Table S1.** Physicochemical Properties of the Samples.

| Samples                             | Surface area (m <sup>2</sup> /g) | Total pore volume (cm <sup>3</sup> /g) | Average pore diameter (nm) |
|-------------------------------------|----------------------------------|----------------------------------------|----------------------------|
| Co <sub>3</sub> O <sub>4</sub> /NF  | 12.3                             | 0.025                                  | 3.41                       |
| Mn <sub>1</sub> Co <sub>2</sub> /NF | 19.4                             | 0.032                                  | 3.82                       |
| Mn <sub>1</sub> Co <sub>1</sub> /NF | 10.1                             | 0.032                                  | 3.82                       |
| Mn <sub>2</sub> Co <sub>1</sub> /NF | 1.5                              | 0.025                                  | 3.41                       |

1. Z. Hou, L. Dai, Y. Liu, J. Deng, L. Jing, W. Pei, R. Gao, Y. Feng and H. Dai, Highly efficient and enhanced sulfur resistance supported bimetallic single-atom palladium-cobalt catalysts for benzene oxidation, *Applied Catalysis B-Environmental*, 2021, **285**.
2. K. Yang, Y. Liu, J. Deng, X. Zhao, J. Yang, Z. Han, Z. Hou and H. Dai, Three-dimensionally ordered mesoporous iron oxide-supported single-atom platinum: Highly active catalysts for benzene combustion, *Applied Catalysis B: Environmental*, 2019, **244**, 650-659.
3. J. Lichtenberger, Catalytic oxidation of chlorinated benzenes over V<sub>2</sub>O<sub>5</sub>/TiO<sub>2</sub> catalysts, *Journal of Catalysis*, 2004, **223**, 296-308.
4. X. Ma, M. Xiao, X. Yang, X. Yu and M. Ge, Boosting benzene combustion by engineering oxygen vacancy-mediated Ag/CeO<sub>2</sub>-Co<sub>3</sub>O<sub>4</sub> catalyst via interfacial electron transfer, *J Colloid Interface Sci*, 2021, **594**, 882-890.
5. Y. Liang, Y. Liu, J. Deng, K. Zhang, Z. Hou, X. Zhao, X. Zhang, K. Zhang, R. Wei and H. Dai, Coupled palladium–tungsten bimetallic nanosheets/TiO<sub>2</sub> hybrids with enhanced catalytic activity and stability for the oxidative removal of benzene, *Environmental science & technology*, 2019, **53**, 5926-5935.
